# Supplementary material
Source: Elsevier journal article supplement (https://www.sciencedirect.com/science/article/pii/S0213911121000480)
Supplement: mmc1 [file S0213911121000480:mmc1.doc]

**Apéndice**

**Tabla I**

Análisis de regresión logística bivariado entre las variables independientes y la capacidad de respuesta de los sistemas de salud de la atención primaria general y por dominios, valorada por hombres con enfermedades crónicas

|  | **Atención rápida** | **Dignidad** | **Comunicación** | **Autonomía** | **Confidencialidad** | **Calidad básica** | **General** |
| --- | --- | --- | --- | --- | --- | --- | --- |
| Edad  <60 años  ≥60 años | 1  1,43 (0,51-3,96) | NA | NA | 1  1,61 (0,34-7,53) | NA | 1  1,45 (0,50-4,18) | 1  2,48 (0,31-19,68) |
| Educación  Alta  Baja | 1  1,75 (0,01-3,10) | NA | NA | NA | NA | 1  4,64 (0,58-37,23) | NA |
| Ocupación  No jubilado  Jubilado | 1  0,75 (0,29-1,92) | 1  0,12 (0,01-2,05) | NA | 1  1,87 (0,41-8,66) | NA | 1  1,35 (0,46-3,92) | 1  2,34 (0,29-18,60) |
| Clase social  Media-alta  Baja | 1  0,78 (0,55-1,09) | 1  1,12 (0,28-4,52) | NA | 1  1,29 (0,85-1,97) | NA | 1  1,11 (0,80-1,56) | 1  1,14 (0,70-1,86) |
| Salud autopercibida  Buena  Mala | 1  0,53a (0,28-0,99) | 0,66 (0,04-10,79) | NA | 1  0,77 (0,34-1,76) | NA | 1  1,44 (0,74-2,83) | 1  1,84 (0,62-5,41) |
| Enfermedades  1  ≥2 | 1  0,99 (0,48-2,03) | 1  0,32 (0,02-5,24) | NA | 1  1,13 (0,42-3,06) | NA | 1  1,36 (0,62-2,95) | 1  0,62 (0,22-1,76) |
| Medicamentos  <5  ≥5 | 1  0,62 (0,33-1,18) | 1  1,44 (0,09-23,35) | NA | 1  1,08 (0,47-2,48) | NA | 1  1,02 (0,53-1,97) | 1  1,16 (0,44-3,11) |
| Residencia  Rural  Urbana | 1  8,21a (2,76-24,38) | NA | NA | 1  1,05 (0,41-2,70) | NA | 1  2,09 (0,89-4,89) | 1  1,60 (0,44-5,81) |

aDominios significativos en el análisis de regresión logística bivariado.

**Tabla II**

Análisis de regresión logística multivariado entre variables independientes y el dominio de atención inmediata valorada por hombres con enfermedades crónicas.

|  | Atención rápida |
| --- | --- |
| Salud autopercibida  Buena  Mala | 1  0,52 (0,26-1,01) |
| Residencia  Rural  Urbana | 1  8,32a (2,78-24,91) |

aDominio significativo en el análisis de regresión logística multivariado.

**Tabla III**

Análisis de regresión logística bivariado entre las variables independientes y la capacidad de respuesta de los sistemas de salud de atención primaria general y por dominios, valorada por mujeres con enfermedades crónicas

|  | **Atención rápida** | **Dignidad** | **Comunicación** | **Autonomía** | **Confidencialidad** | **Calidad básica** | **General** |
| --- | --- | --- | --- | --- | --- | --- | --- |
| Edad  <60 años  ≥60 años | 1  1,49 (0,73-3,07) | 0,93 (0,10-8.52) | 1  0,33 (0,09-1,21) | 1  1,63 (0,59-4,501) | NA | 1  0,49a (0,25-0,96) | 1  1,10 (0,43-2,85) |
| Educación  Alta  Baja | 1  1,98 (0,69-5,65) | 1  0,37 (0,04-8,89) | 1  0,20a (0,05-0,83) | 1  0,60 (0,20-1,80) | 1  0,09 (0,01-1,53) | 1  0,90 (0,34-2,36) | 1  0,28a (0,08-0,76) |
| Ocupación  No jubilada  Jubilada | 1  1,42 (0,72-2,83) | NA | 1  0,09a (0,02-0,40) | 1  1,27 (0,52-3,14) | NA | 1  0,87 (0,44-1,69) | 1  0,70 (0,30-1,62) |
| Clase social  Media-alta  Baja | 1  0,77 (0,56-1,04) | 1  2,38 (0,79-7,19) | 1  0,82 (0,40-1,66) | 1  1,55a (1,08-2,24) | 1  1,17 (0,29-4,71) | 1  1,12 (0,83-1,52) | 1  1,30 (0,89-1,90) |
| Salud autopercibida  Buena  Mala | 1  1,46 (0,81-2,65) | NA | 1  1,89 (0,39-9,14) | 1  1,39 (0,63-3,06) | 1  0,46 (0,20-1,10) | 1  1,07 (0,59-1,93) | 1  2,41 (0,95-6,10) |
| Enfermedades  1  ≥2 | 1  0,84 (0,46-1,55) | 1  1,41 (0,15-12,83) | 1  0,51 (0,14-1,86) | 1  2,34 (0,92-5,956) | NA | 1  1,44 (0,75-2,78) | 1  0,81 (0,36-1,82) |
| Medicamentos  <5  ≥5 | 1  1,45 (0,84-2,52) | 1  0,90 (0,15-5,48) | 1  0,57 (0,14-2,24) | 1  1,38 (0,69-2,75) | NA | 1  1,92a (1,10-3,37) | 1  1,24 (0,60-2,58) |
| Residencia  Rural  Urbana | 1  4,00a (1,77-9,05) | NA | 1  2,54 (0,31-20,56) | 1  1,21 (0,51-2,84) | NA | 1  0,80 (0,42-1,56) | 1  1,33 (0,52-3,42) |

*Dominios significativos en el análisis de regresión logística bivariado.

**Tabla IV**

**Análisis de regresión logística multivariado entre variables independientes y los dominios de comunicación y calidad básica valorado por mujeres con enfermedades crónicas.**

|  | Comunicación | Calidad básica |
| --- | --- | --- |
| Educación  Alta  Baja | 1  0,37 (0,08-1,74) | **-** |
| Ocupación  No jubilada  Jubilada | 1  0,12a (0,03-0,50) | - |
| Edad  <60 años  ≥60 años | - | 1  0,42a (0,21-0,85) |
| Medicamentos  <5  ≥5 | - | 1  2,14a (1,20-3,82) |

*Dominios significativos en el análisis de regresión logística multivariado.
